# Supplementary material for: Modelling Population Dynamics in Realistic Landscapes with Linear Elements: A Mechanistic-Statistical Reaction-Diffusion Approach
Source: PLOS journal article supplement (doi:10.1371/journal.pone.0151217), 2016-03-17
Supplement: S2 (10.1371/journal.pone.0151217.s002) [file journal.pone.0151217.s002]

We assume that the growth functions satisfy  $f = 0$  and  $g = 0$ , and that there is no introduction point (we recall that reflecting conditions have been assumed on the exterior boundaries). Let us define

$$P(t) = P_{2D}(t) + P_{1D}(t),$$

where  $P_{2D}$  is the total population in the 2D patches:

$$P_{2D}(t) = \sum_{i=1}^I \int_{\Omega_i} v_i(t, \cdot), \quad (\text{A})$$

and  $P_{1D}$  is the total population on the 1D edges:

$$P_{1D}(t) = \sum_{\lambda_i^k \in \Lambda_{\text{int}}} \int_{\lambda_i^k} u_i^k(t, \cdot), \quad (\text{B})$$

where  $\Lambda_{\text{int}}$  corresponds to the set of interior edges (corridors).

Integrating by parts the equation (2), which is satisfied by the population density on any patch  $\Omega_i$ , the following can be obtained:

$$\partial_t \int_{\Omega_i} v_i = \int_{\Omega_i} \Delta v_i = \int_{\partial\Omega_i} \nabla v_i \cdot \mathbf{n}. \quad (\text{C})$$

Using the boundary conditions (3) and (4), and because

$$\partial\Omega_i = \bigcup_k \lambda_i^k,$$

the result is:

$$\partial_t \int_{\Omega_i} v_i = d \sum_{k \text{ s.t. } \lambda_i^k \in \Lambda_{\text{int}}} \mu \int_{\lambda_i^k} u_i^k - \nu \int_{\lambda_i^k} v_i. \quad (\text{D})$$

Using the relations (A) and (D), it can be observed that:

$$P'_{2D}(t) = \sum_{\lambda_i^k \in \Lambda_{\text{int}}} \mu \int_{\lambda_i^k} u_i^k - \nu \int_{\lambda_i^k} v_i. \quad (\text{E})$$

Then, rewriting  $P_{1D}$  in the form

$$P_{1D}(t) = \sum_{\lambda_i^k \in \Lambda_{\text{int}}} \int_0^{L(\lambda_i^k)} \tilde{u}_i^k(t, \cdot)$$

and using the equation (5), we get:

$$\begin{aligned} P'_{1D}(t) = & \sum_{\lambda_i^k \in \Lambda_{\text{int}}} D(\partial_z \tilde{u}_i^k(L(\lambda_i^k)) - \partial_z \tilde{u}_i^k(0)) \\ & - \mu \int_{\lambda_i^k} u_i^k + \nu \int_{\lambda_i^k} v_i \\ & + \sum_{\lambda_i^k \in \Lambda_{\text{int}}} -\alpha \int_{\lambda_i^k} u_i^k + \alpha \int_{\lambda_i^k} u_{i'}^{k'}. \end{aligned} \quad (\text{F})$$

Using the standard boundary conditions (6) and (8), for each  $i$ ,

$$\sum_{k \text{ s.t. } \lambda_i^k \in \Lambda_{\text{int}}} D(\partial_z \tilde{u}_i^k(L(\lambda_i^k)) - \partial_z \tilde{u}_i^k(0)) = 0.$$

In addition, because the application  $Q : (i, k) \mapsto (i', k')$  is a bijection from the set of all indices  $\{(i, k) \text{ s.t. } \lambda_i^k \in \Lambda_{\text{int}}\}$  to itself, it can readily be determined that

$$\sum_{\lambda_i^k \in \Lambda_{\text{int}}} \alpha \int_{\lambda_i^k} u_i^k = \sum_{\lambda_i^{k'} \in \Lambda_{\text{int}}} \alpha \int_{\lambda_i^{k'}} u_i^{k'}.$$

Finally, adding the equations (E) and (F) results in:

$$P'(t) = 0,$$

which means that the total mass was conserved.
